# Supplementary material for: Regular group exercise is associated with improved mood but not quality of life following stroke
Source: PeerJ. 2014 Mar 27;2:e331. doi: 10.7717/peerj.331 (PMC3976114; doi:10.7717/peerj.331)
Supplement: Supplemental Information 1 — Excel data file with all results. [file peerj-02-331-s001.xlsx]

## Sheet: Sheet1
id	StrokeYN	Side1R	Yrssincestroke	Sex	Age	Education	MOCA	Stress	Anxiety	Depression	AQoL	FAC
1	1	1	11	1	73	7	21	9	7	13	41	5
6	1	2	3	2	64	16	26	9	1	2	20	5
8	1	1	10	2	75	10	26	1	1	0	26	5
12	1	2	3	1	81	9	22	3	0	1	20	5
17	1	1	5	1	58	14	22	0	1	0	29	4
18	1	2	25	1	76	9	14	2	3	2	27	5
19	1	2	1	2	73	18	30	2	5	4	24	5
20	1	2	12	1	80	14	22	0	4	2	22	5
21	1	1	9	1	78	10	23	9	6	4	36	2
22	1	1	3	1	75	9	20	0	3	0	21	5
23	1	2	9	2	73	9	21	3	9	10	40	4
24	1	1	13	1	69	16	23	14	11	7	39	1
25	1	1	17	1	74	8	24	3	4	0	28	5
26	1	2	20	1	79	8	19	0	4	2	29	4
28	1	1	1	1	64	11	25	1	3	3	24	5
29	1	2	3	2	38	12	12	1	1	16	29	5
30	1	1	6	1	62	14	19	0	0	0	34	5
			8.88235	F = 5/17	70.1176	11.4118	21.7059	3.35294	3.70588	3.88235	28.7647	4.41176
			6.92714		10.6059	3.31773	4.31226					1.17574
2	2	.	.	1	82	12	21	1	1	0	17	5
3	2	.	.	2	80	10	24	4	2	1	27	5
4	2	.	.	2	74	10	26	0	4	0	23	5
5	2	.	.	2	60	9	28	1	3	1	18	5
7	2	.	.	1	70	9	25	3	1	0	18	5
9	2	.	.	2	68	8	23	0	1	1	20	5
10	2	.	.	2	67	22	27	0	1	12	22	5
11	2	.	.	2	64	10	28	8	0	3	25	5						0.705882
13	2	.	.	2	74	14	27	0	0	0	17	5						0.153846
14	2	.	.	2	64	10	25	0	6	9	35	5
15	2	.	.	1	70	8	28	5	4	5	31	5						mean	3.35294	3.70588	3.88235	28.7647
16	2	.	.	2	61	12	26	4	5	2	19	5							2.07692	2.38462	2.76923	23.3077
27	2	.	.	1	62	17	27	1	3	2	31	5							0.344219	0.193229	0.499523	0.032659
				F = 9/13	68.9231	11.6154	25.7692	2.07692	2.38462	2.76923	23.3077	5
					7.01738	4.0112	2.12736					0
01PC	3	2	2	1	80	8	16	6	14	21	34	5
02HZ	3	1	3	1	64	10	24	18	8	19	32	5
03RD	3	2	1	1	62	10	30	3	1	0	31	5
04CS	3	1	1	2	56	10	26	3	0	2	23	5
05RS	3	1	1	1	63	10	26	5	0	3	28	5
06JM	3	1	1	1	64	11	29	5	5	7	30	5
07LF	3	2	2	1	82	8	20	18	8	25	30	5
08JW	3	2	1	2	58	8	25	32	17	25	32	5
09BF	3	2	2	1	63	10	25	14	8	27	30	5
10AK	3	1	2	1	64	9	23	1	3	6	19	5
			1.6	F = 2/9	65.6	9.4	24.4	10.5	6.4	13.5	28.9	5
			0.726483		8.56608	1.07497	4.08792	9.83475	5.79655	10.8346	4.55705	0

## Sheet: SPSS
id	StrokeYN	Side1R	Yrssincestroke	Sex	Age	Education	MOCA	Stress	Anxiety	Depression	AQoL	FAC			id
1	1	1	11	1	73	7	21	9	7	13	41	5			StrokeYN
6	1	2	3	2	64	16	26	9	1	2	20	5			Side1R
8	1	1	10	2	75	10	26	1	1	0	26	5			Yrssincestroke
12	1	2	3	1	81	9	22	3	0	1	20	5			Sex
17	1	1	5	1	58	14	22	0	1	0	29	4			Age
18	1	2	25	1	76	9	14	2	3	2	27	5			Education
19	1	2	1	2	73	18	30	2	5	4	24	5			MOCA
20	1	2	12	1	80	14	22	0	4	2	22	5			Stress
21	1	1	9	1	78	10	23	9	6	4	36	2			Anxiety
22	1	1	3	1	75	9	20	0	3	0	21	5			Depression
23	1	2	9	2	73	9	21	3	9	10	40	4			AQoL
24	1	1	13	1	69	16	23	14	11	7	39	1
25	1	1	17	1	74	8	24	3	4	0	28	5
26	1	2	20	1	79	8	19	0	4	2	29	4
28	1	1	1	1	64	11	25	1	3	3	24	5
29	1	2	3	2	38	12	12	1	1	16	29	5
30	1	1	6	1	62	14	19	0	0	0	34	5
2	2	.	.	1	82	12	21	1	1	0	17	5
3	2	.	.	2	80	10	24	4	2	1	27	5
4	2	.	.	2	74	10	26	0	4	0	23	5
5	2	.	.	2	60	9	28	1	3	1	18	5
7	2	.	.	1	70	9	25	3	1	0	18	5
9	2	.	.	2	68	8	23	0	1	1	20	5
10	2	.	.	2	67	22	27	0	1	12	22	5
11	2	.	.	2	64	10	28	8	0	3	25	5
13	2	.	.	2	74	14	27	0	0	0	17	5
14	2	.	.	2	64	10	25	0	6	9	35	5
15	2	.	.	1	70	8	28	5	4	5	31	5
16	2	.	.	2	61	12	26	4	5	2	19	5
27	2	.	.	1	62	17	27	1	3	2	31	5
01PC	3	2	2	1	80	8	16	6	14	21	34	5
02HZ	3	1	3	1	64	10	24	18	8	19	32	5
03RD	3	2	1	1	62	10	30	3	1	0	31	5
04CS	3	1	1	2	56	10	26	3	0	2	23	5
05RS	3	1	1	1	63	10	26	5	0	3	28	5
06JM	3	1	1	1	64	11	29	5	5	7	30	5
07LF	3	2	2	1	82	8	20	18	8	25	30	5
08JW	3	2	1	2	58	8	25	32	17	25	32	5
09BF	3	2	2	1	63	10	25	14	8	27	30	5
10AK	3	1	2	1	64	9	23	1	3	6	19	5
